# Supplementary material
Source: PubMed Central journal article supplement (PMC2909764)

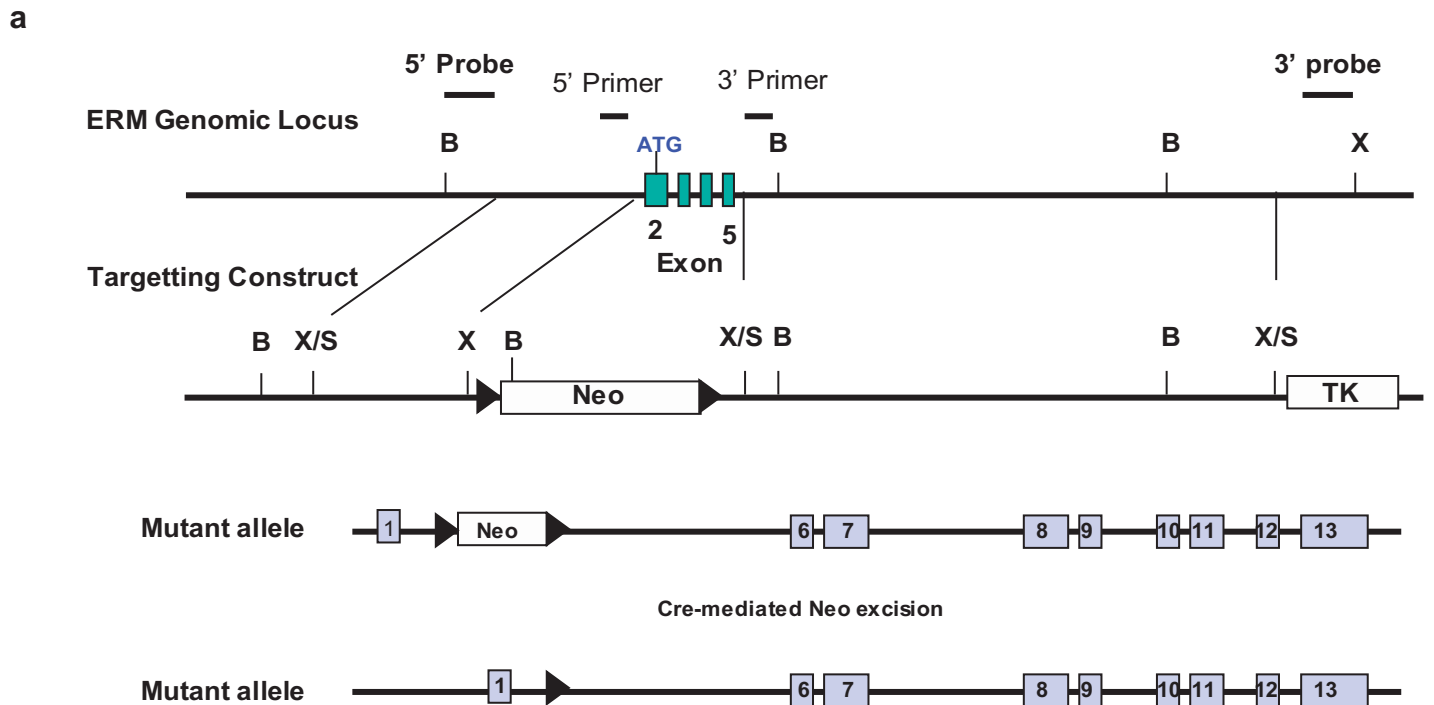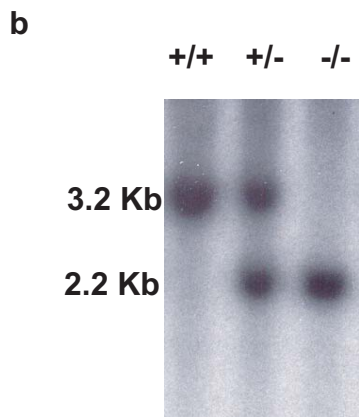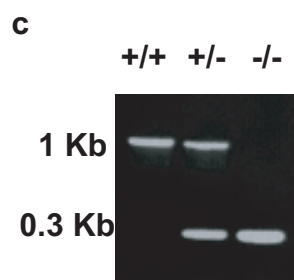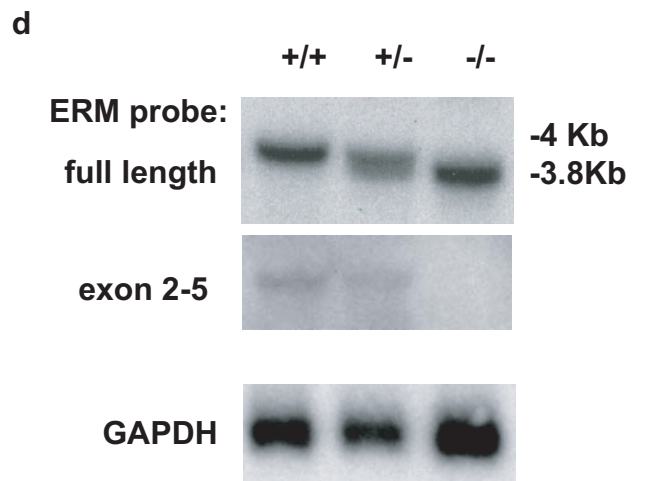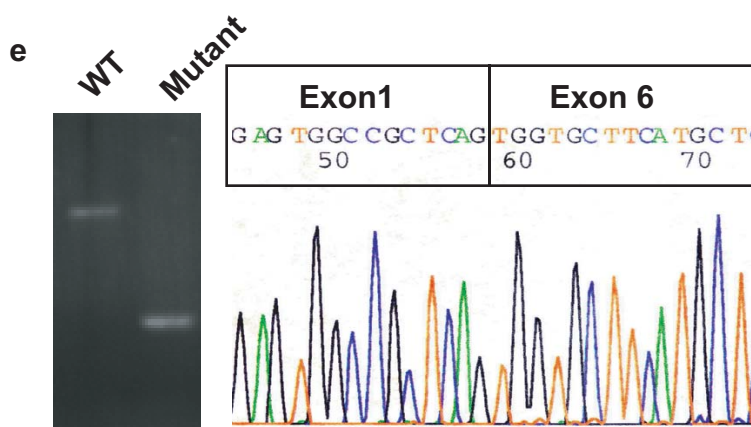

Supplement: NIHMS217524-supplement-Figure_1.pdf [file NIHMS217524-supplement-Figure_1.pdf]

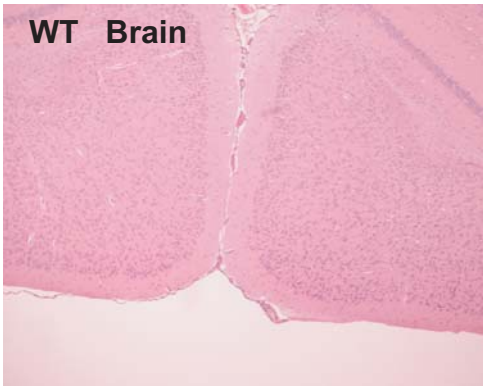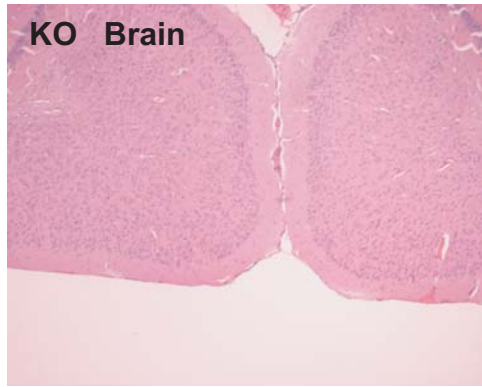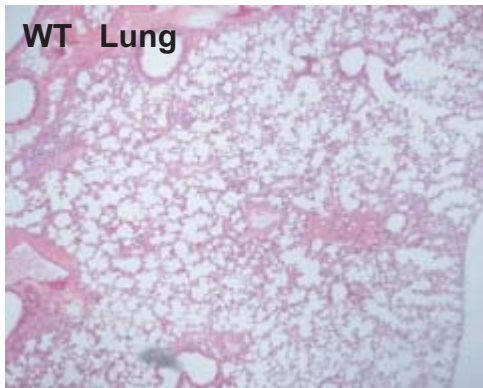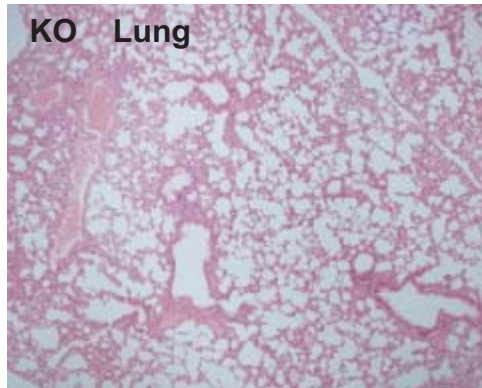

Supplement: NIHMS217524-supplement-Figure_2.pdf [file NIHMS217524-supplement-Figure_2.pdf]

**a**

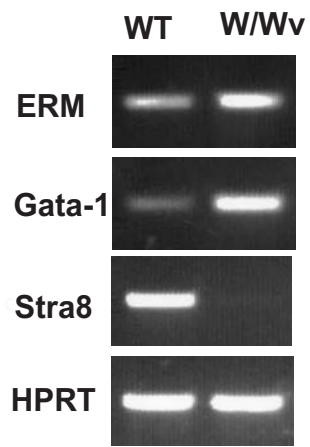

**b**

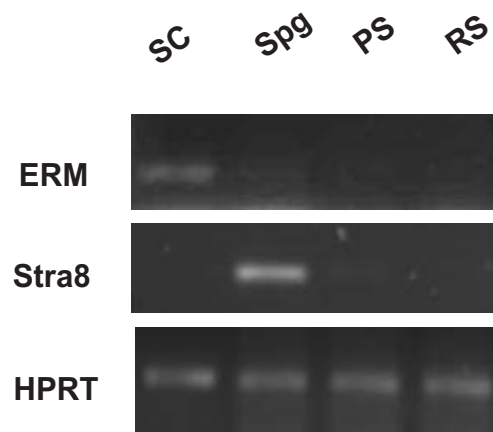

Supplement: NIHMS217524-supplement-Figure_3.pdf [file NIHMS217524-supplement-Figure_3.pdf]

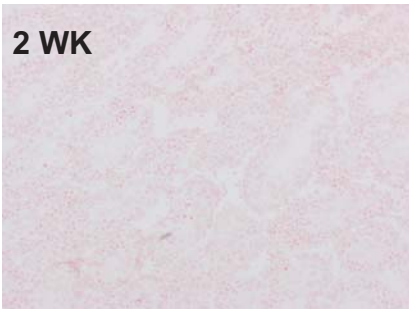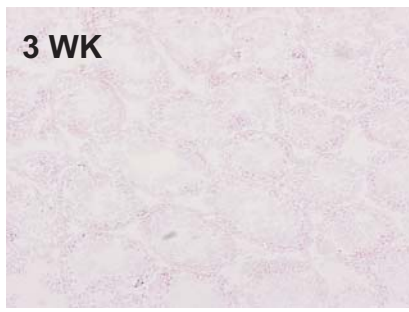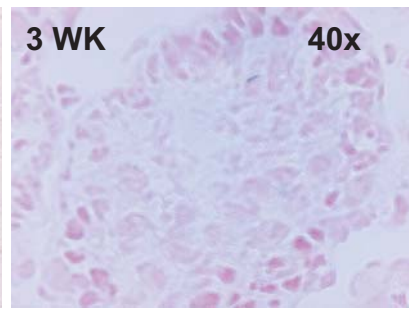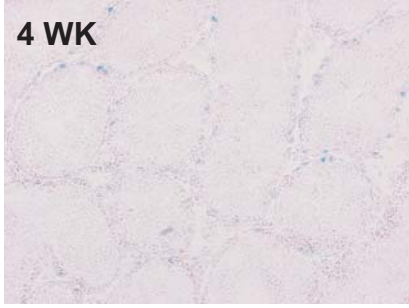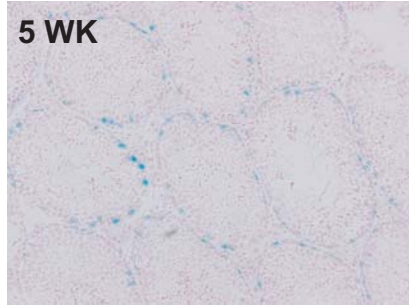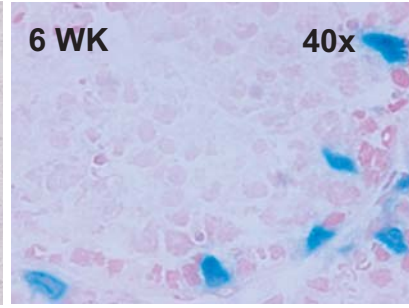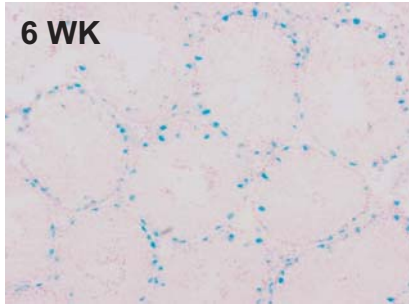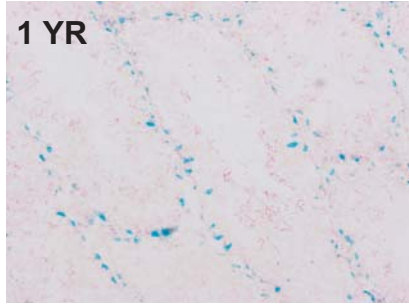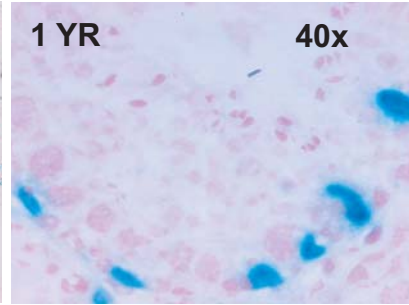

Supplement: NIHMS217524-supplement-Figure_4.pdf [file NIHMS217524-supplement-Figure_4.pdf]

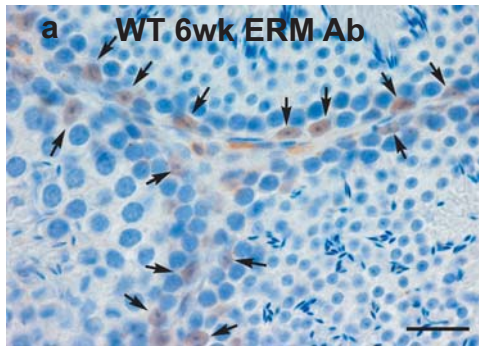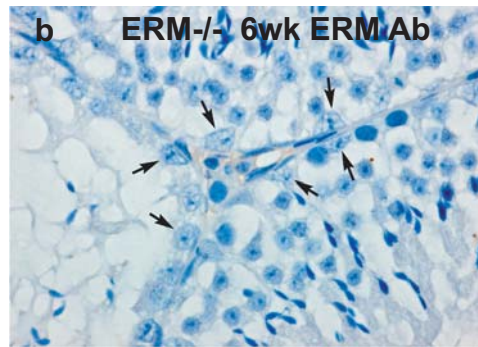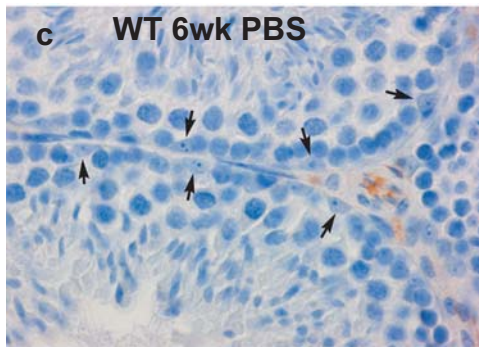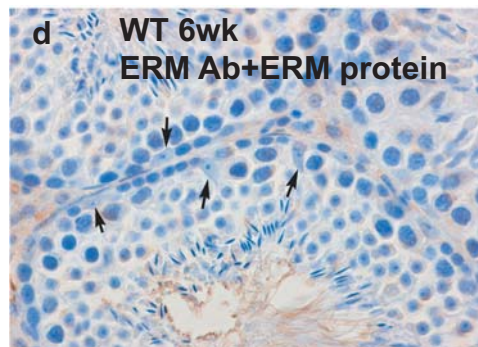

Supplement: NIHMS217524-supplement-Figure_5.pdf [file NIHMS217524-supplement-Figure_5.pdf]

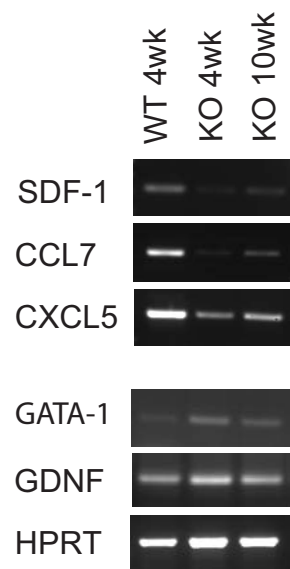

Supplement: NIHMS217524-supplement-Figure_6.pdf [file NIHMS217524-supplement-Figure_6.pdf]
